# Supplementary material for: Selective synthesis and comparative activity of olefinic isomers of 1,2-benzothiazine-1,1-dioxide carboxylates as aldose reductase inhibitors
Source: Royal Society of Chemistry journal article supplement (doi:10.1039/c4ra01016g), 2014-01-01
Supplement: c4ra01016g1.pdf [file c4ra01016g1.pdf]

## Supporting Information

### **Selective synthesis and comparative activity of olefinic isomers of 1,2-benzothiazine-1,1-dioxide carboxylates as aldose reductase inhibitors**

**Shagufta Parveen,<sup>a</sup> Saghir Hussain,<sup>a</sup> Shaojuan Zhu,<sup>a</sup> Xiangyu Qin,<sup>a</sup> Xin Hao,<sup>a</sup> Shuzhen Zhang,<sup>a</sup> Jiangu Lu,<sup>a</sup> and Changjin Zhu (s)<sup>a,b</sup>**

Department of Applied Chemistry, Beijing Institute of Technology,

No. 5, Zhongguancun South Street, 100081 Beijing, China

Tel./fax: +86 10 68918506

zcj@bit.edu

## Table of contents

|                                                                         |    |
|-------------------------------------------------------------------------|----|
| <b>General Experiment</b> -----                                         | 3  |
| <b>1. Optimization of Wittig reaction of 1(a,b)</b> -----               | 3  |
| Table S1. Wittig reaction of 5(a,b) at various temperature-----         | 3  |
| <b>2. <sup>1</sup>H NMR, <sup>13</sup>C NMR &amp; NOE spectra</b> ----- | 4  |
| <b>3. X-Ray Crystallography Data</b> -----                              | 20 |
| 3-1 X-Ray Single Crystal analysis of 2a-----                            | 20 |
| 3-2 X-Ray Single Crystal analysis of 4a-----                            | 22 |

## General Experiment:

Melting points were recorded on a XT4A microscopic melting points apparatus and uncorrected. Thin layer chromatography (TLC) was performed on silica gel Merck 60F<sub>254</sub>. Nuclear Magnetic Resonance (NMR) spectra were recorded using a 400 MHz spectrometer (<sup>1</sup>H NMR at 400 MHz and <sup>13</sup>C NMR at 100 MHz) in [d<sub>6</sub>]-DMSO using TMS as internal reference. <sup>1</sup>H NMR data are reported as follow: chemical shifts (δ, ppm), multiplicity (s=singlet, d= doublet, dd= doublet of doublet, t=triplet, q=quartet, m=multiplet, br=broad), integration, coupling constants (Hz). Data for <sup>13</sup>C NMR are reported in terms of chemical shifts (δ, ppm). Individual resonances were assigned on the basis of their chemical shifts, signal intensities, multiplicity of resonances and coupling constants. MS was performed on varian 500- ms ion trap mass by the ESI method and FTIR spectra was obtained from PerkinElmer Spectrum One FTIR spectrometer.

### 1. Optimization of Wittig reaction of 1(a,b)

Table S1. Synthesis of E, Z and Endocyclic isomers of N-substituted benzothiazine 1,1-dioxide acetic acid derivatives

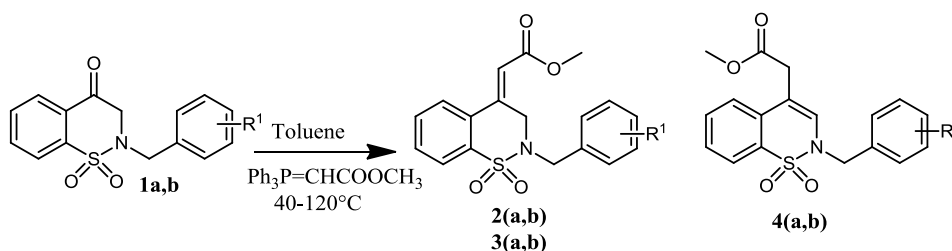

| R             | Product         | % yield at different temperature |      |      |       |       |
|---------------|-----------------|----------------------------------|------|------|-------|-------|
|               |                 | 40 °C                            | 60°C | 80°C | 100°C | 120°C |
| 2,4,5-F (1a)  | Exocyclic       |                                  |      |      |       |       |
|               | Z-isomer (2a)   | 66                               | 48   | 37   | 15.5  | 5.6   |
|               | E-isomer (3a)   | 10.1                             | 16.1 | 11.4 | 5     | 2     |
|               | Endocyclic (4a) | 0                                | 18.2 | 34.5 | 68.4  | 30    |
| 2-F,4-Br (1b) | Exocyclic       |                                  |      |      |       |       |
|               | Z-isomer (2b)   | 74                               | 59   | 32   | 15.7  | 2     |
|               | E-isomer (3b)   | 15                               | 15.3 | 9.8  | 6.2   | 1.5   |
|               | Endocyclic (4b) | 0                                | 20.1 | 38.9 | 65.1  | 81    |

## 2. $^1\text{H}$ NMR, $^{13}\text{C}$ NMR & NOE spectra

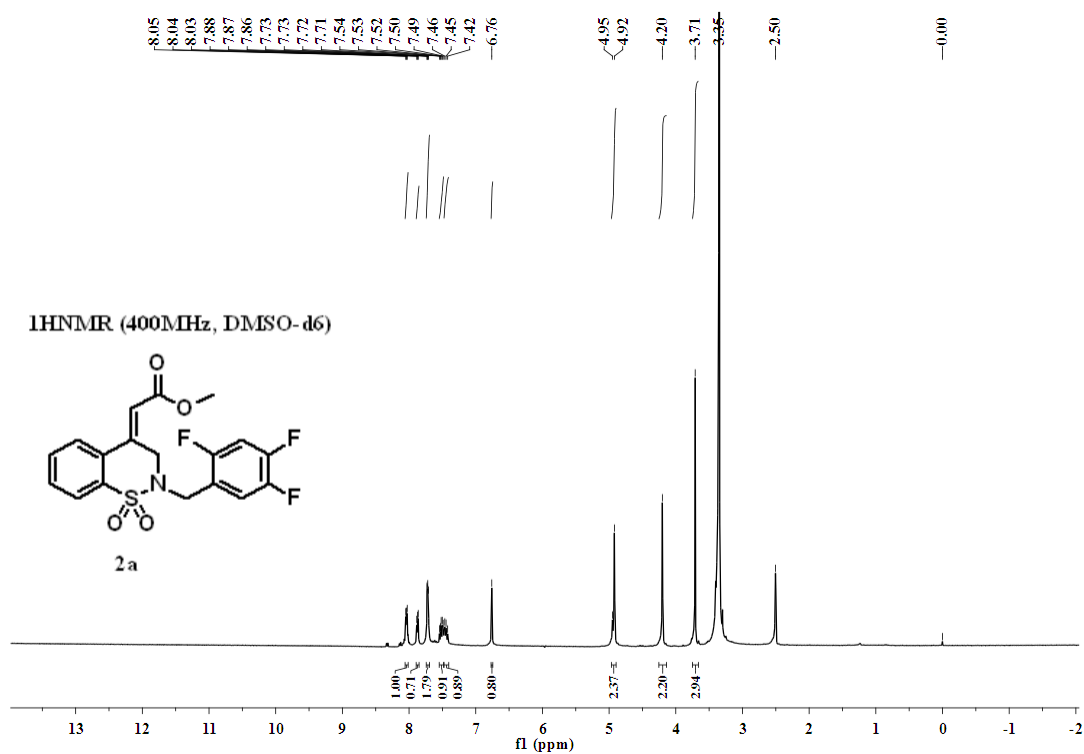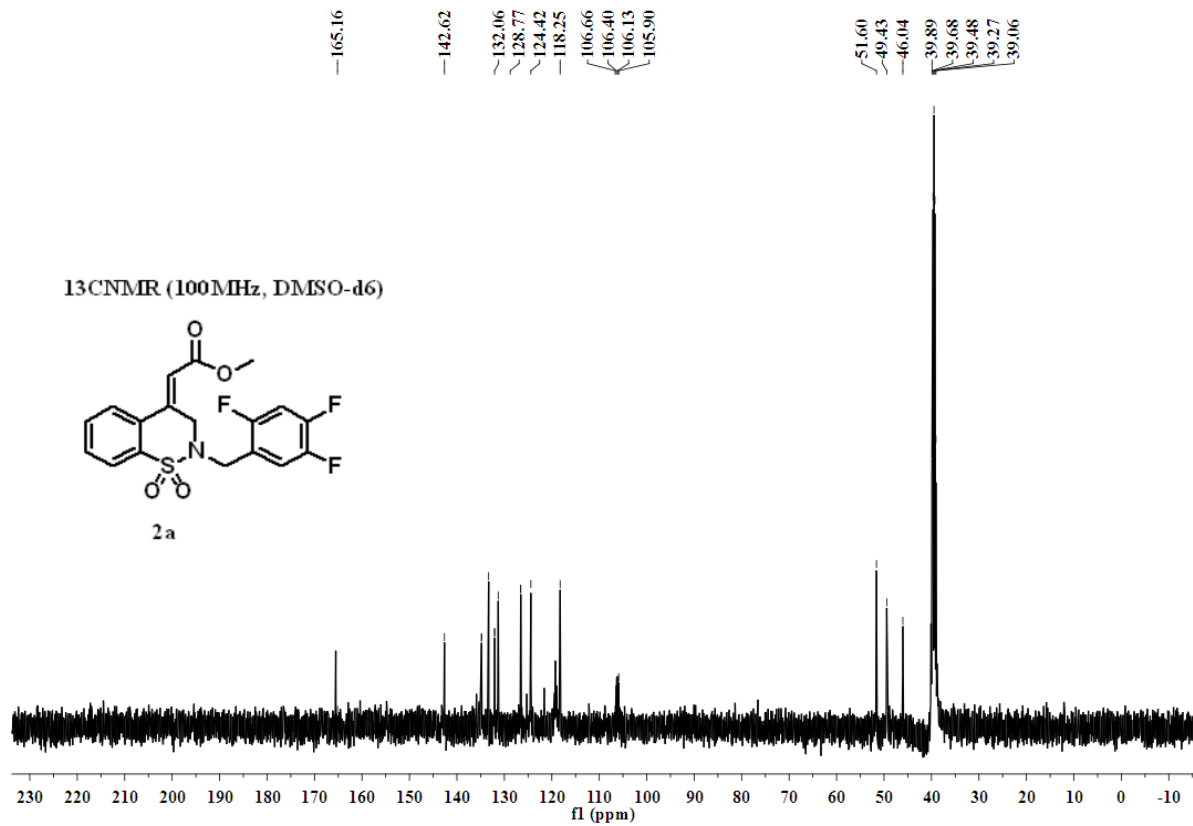

NOESY

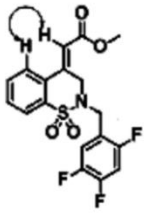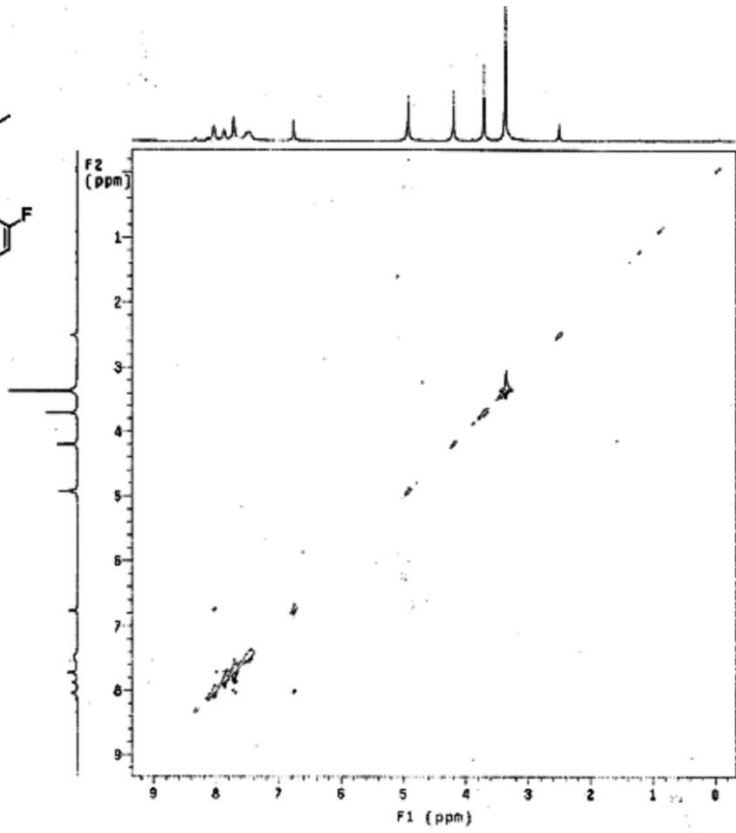

7.83  
7.83  
7.82  
7.81  
7.68  
7.67  
7.66  
7.65  
7.63  
7.56  
7.54  
7.53  
7.52  
7.51  
7.49  
7.49  
7.48  
7.46  
-0.23  
-4.40  
-4.18  
-3.66  
-3.35  
-2.51

<sup>1</sup>H NMR (400 MHz, DMSO-d<sub>6</sub>)

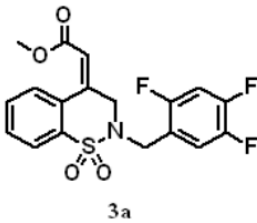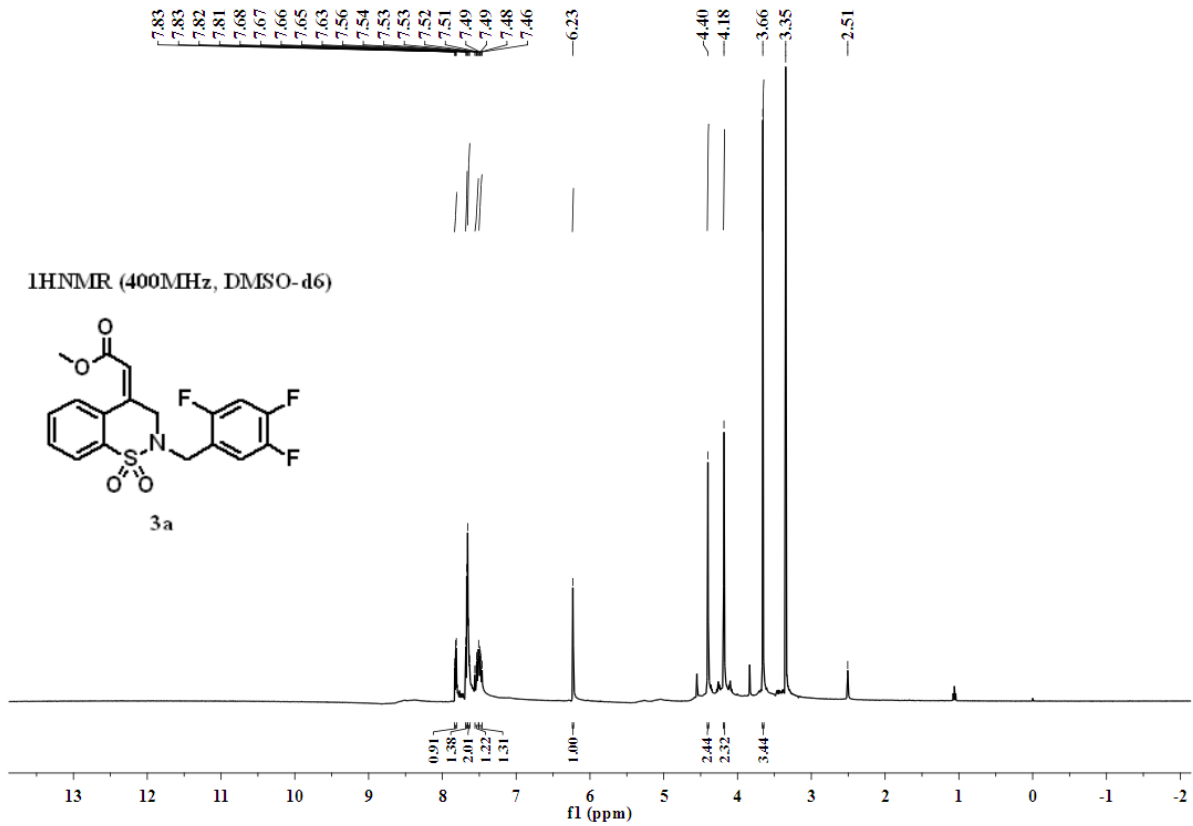

165.59  
 138.23  
 135.75  
 132.07  
 130.57  
 130.46  
 129.95  
 123.61  
 120.60  
 118.87  
 106.44  
 53.98  
 51.61  
 46.45  
 39.92  
 39.72  
 39.51  
 39.30  
 39.09

<sup>13</sup>CNMR (100MHz, DMSO-d<sub>6</sub>)

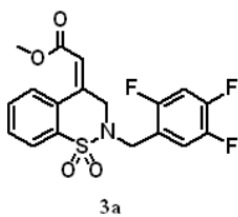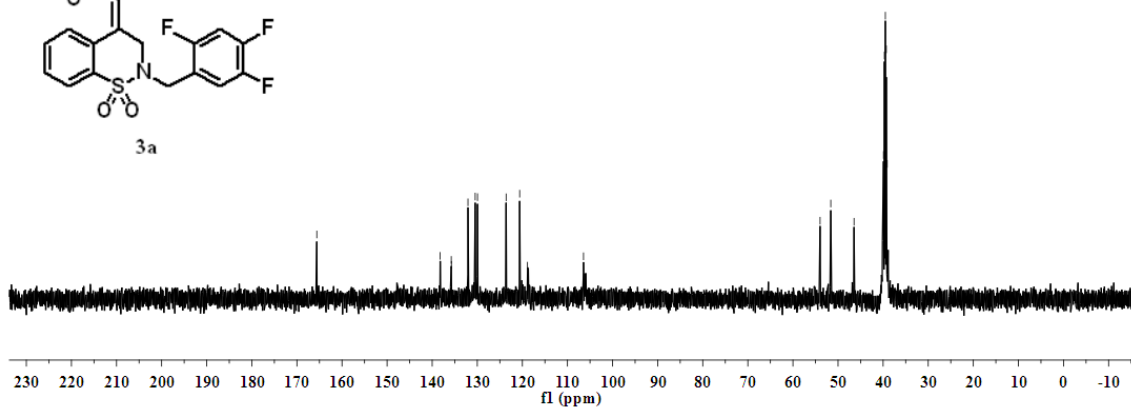

NOESY

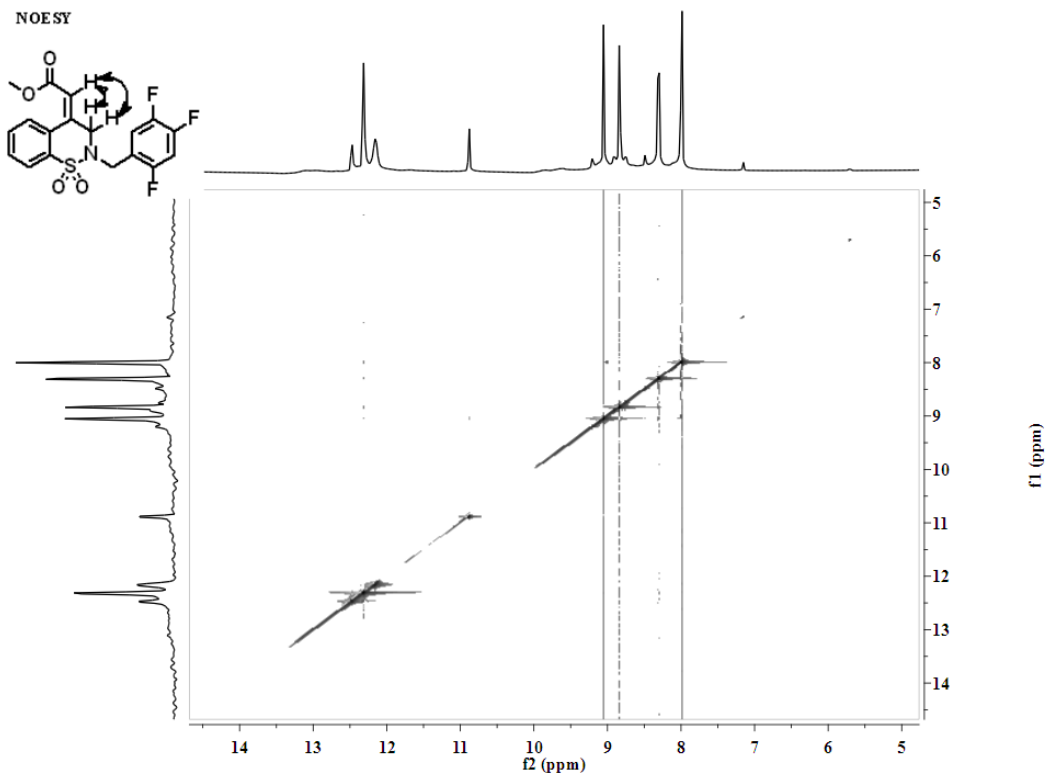

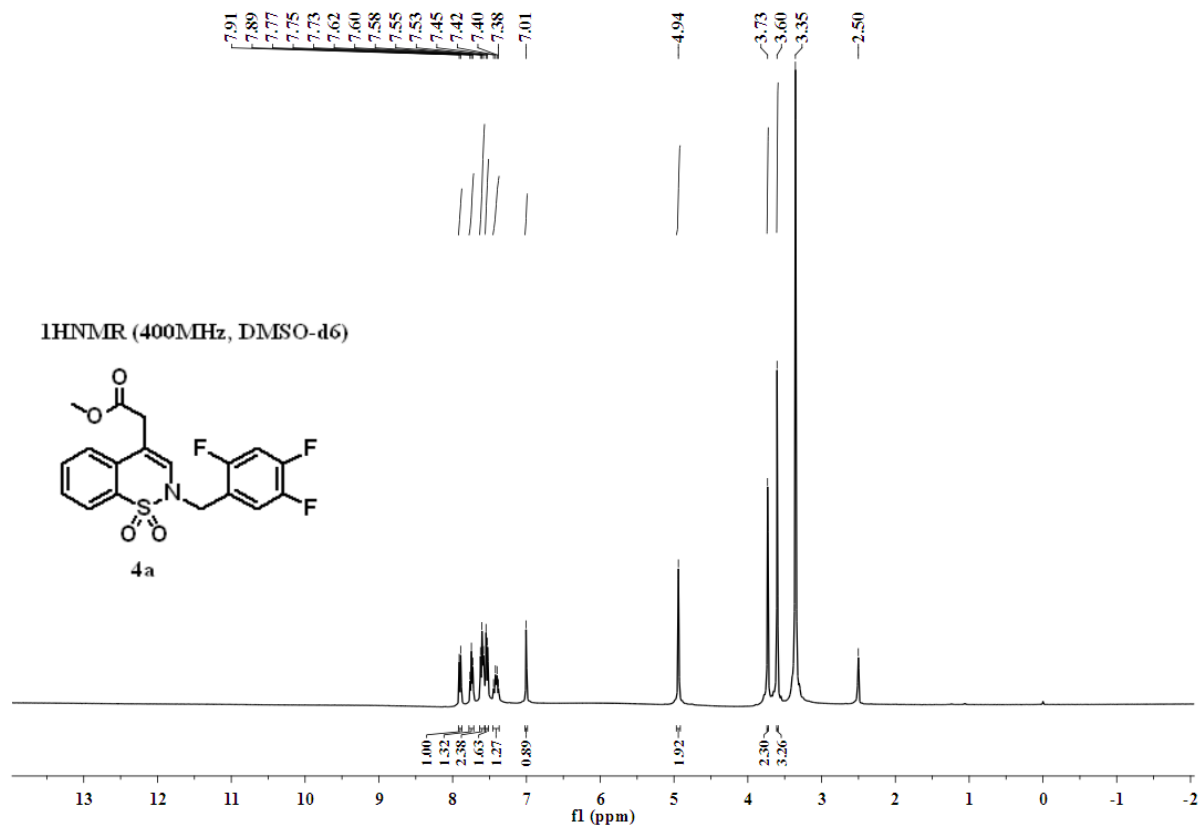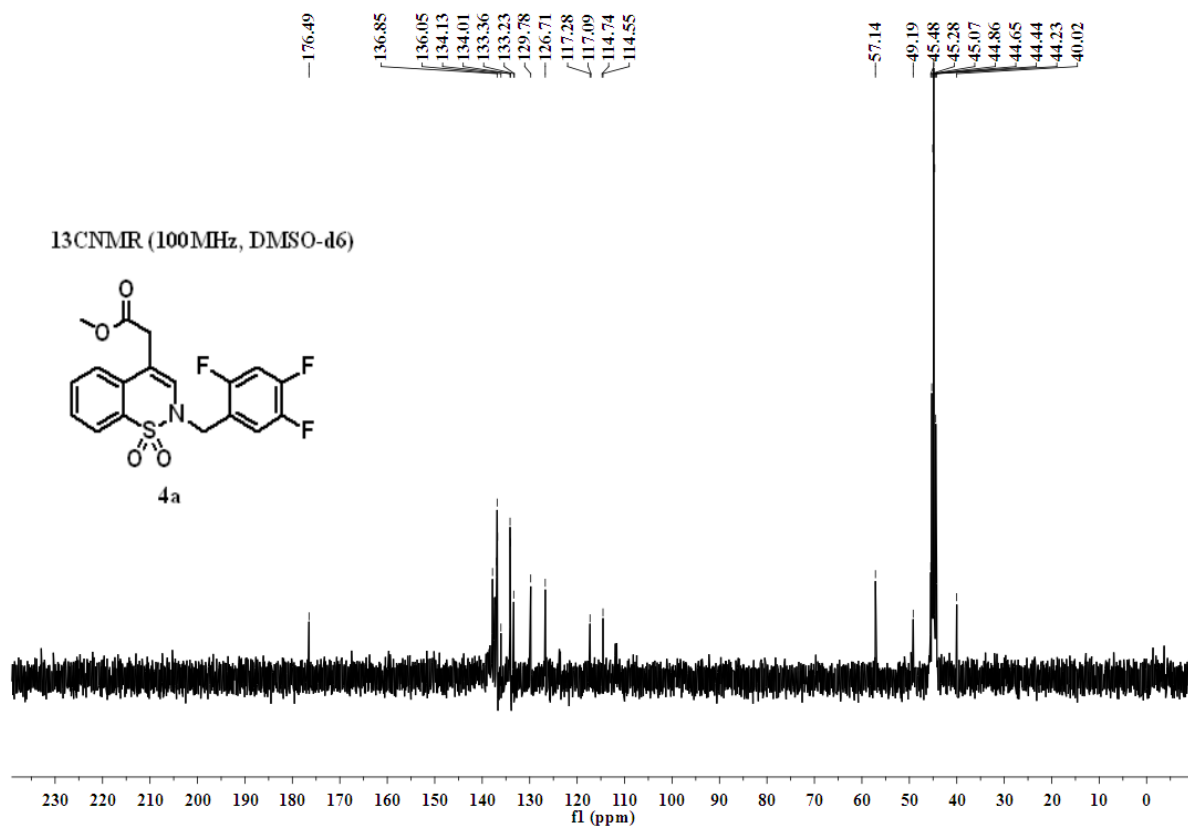

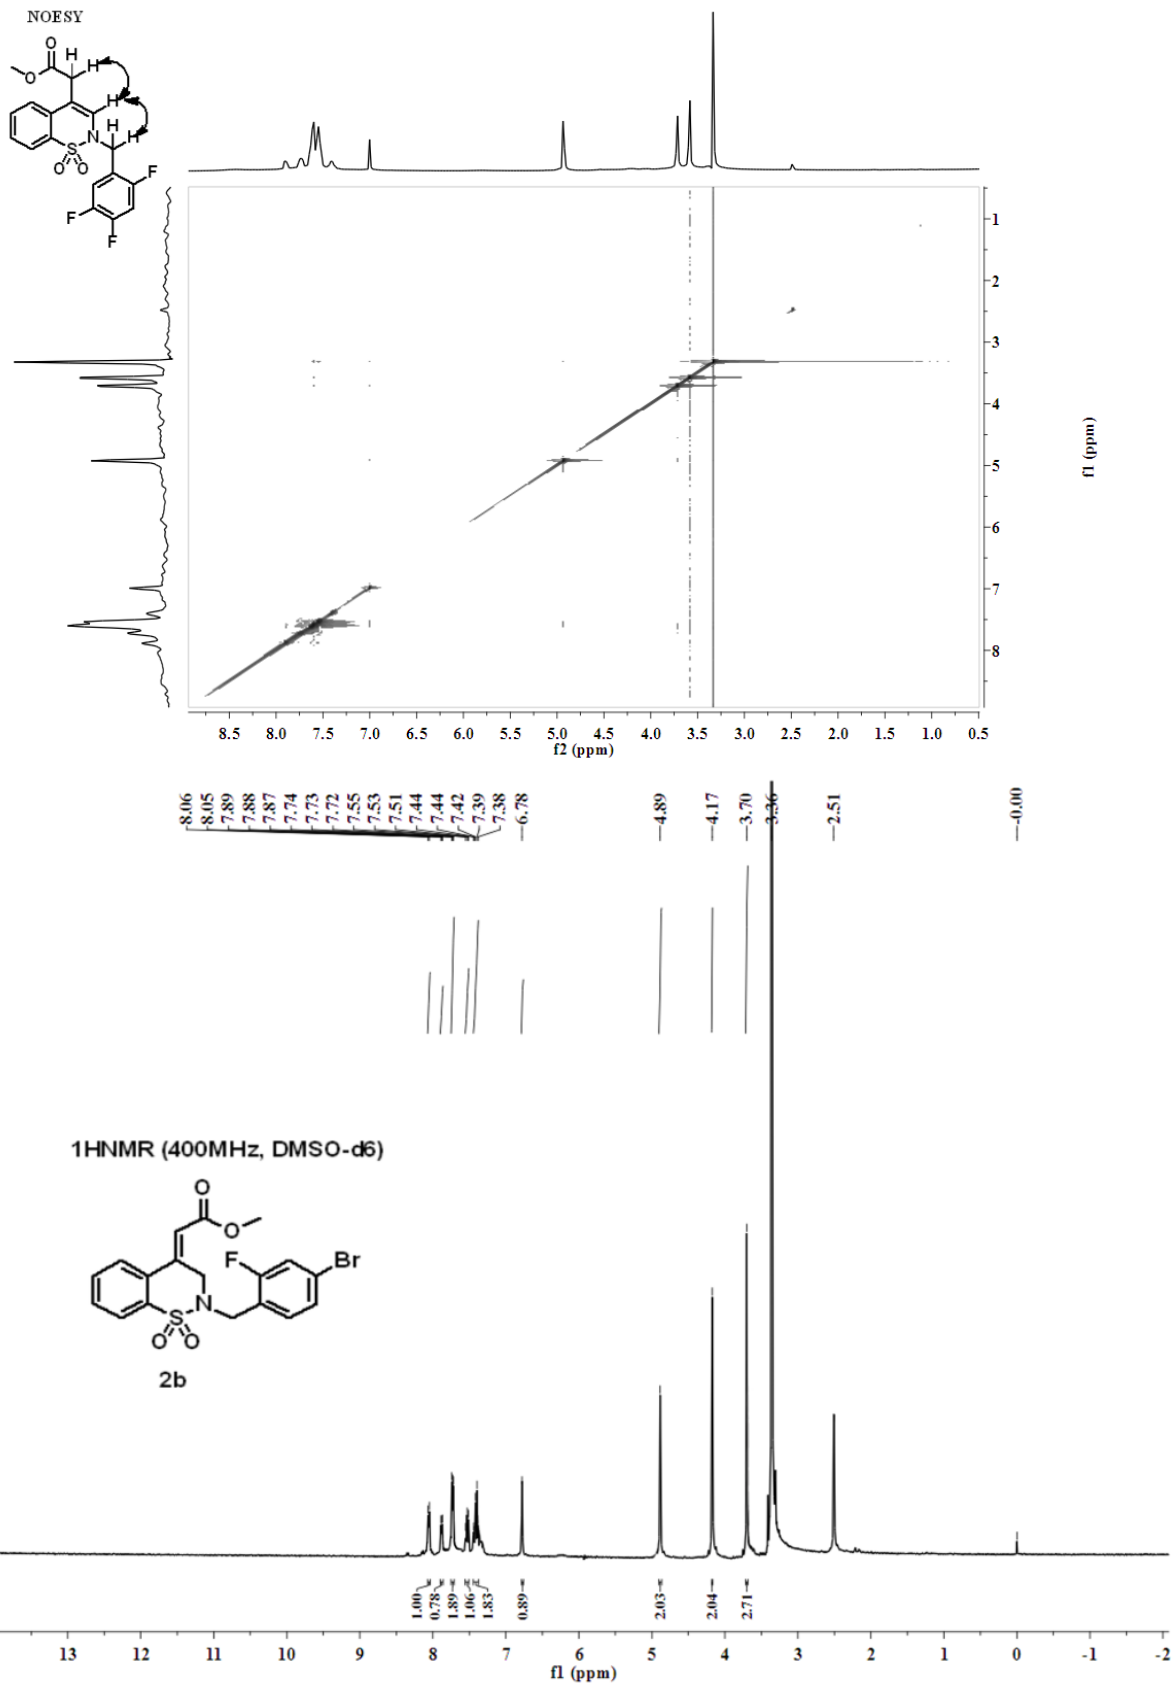



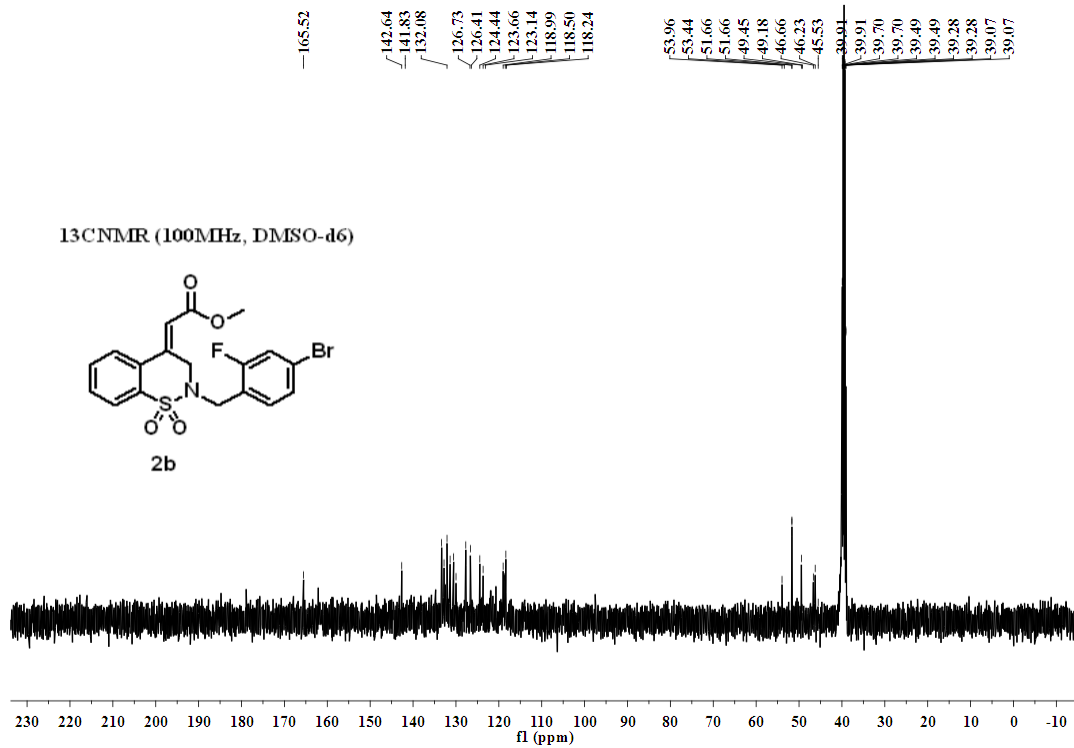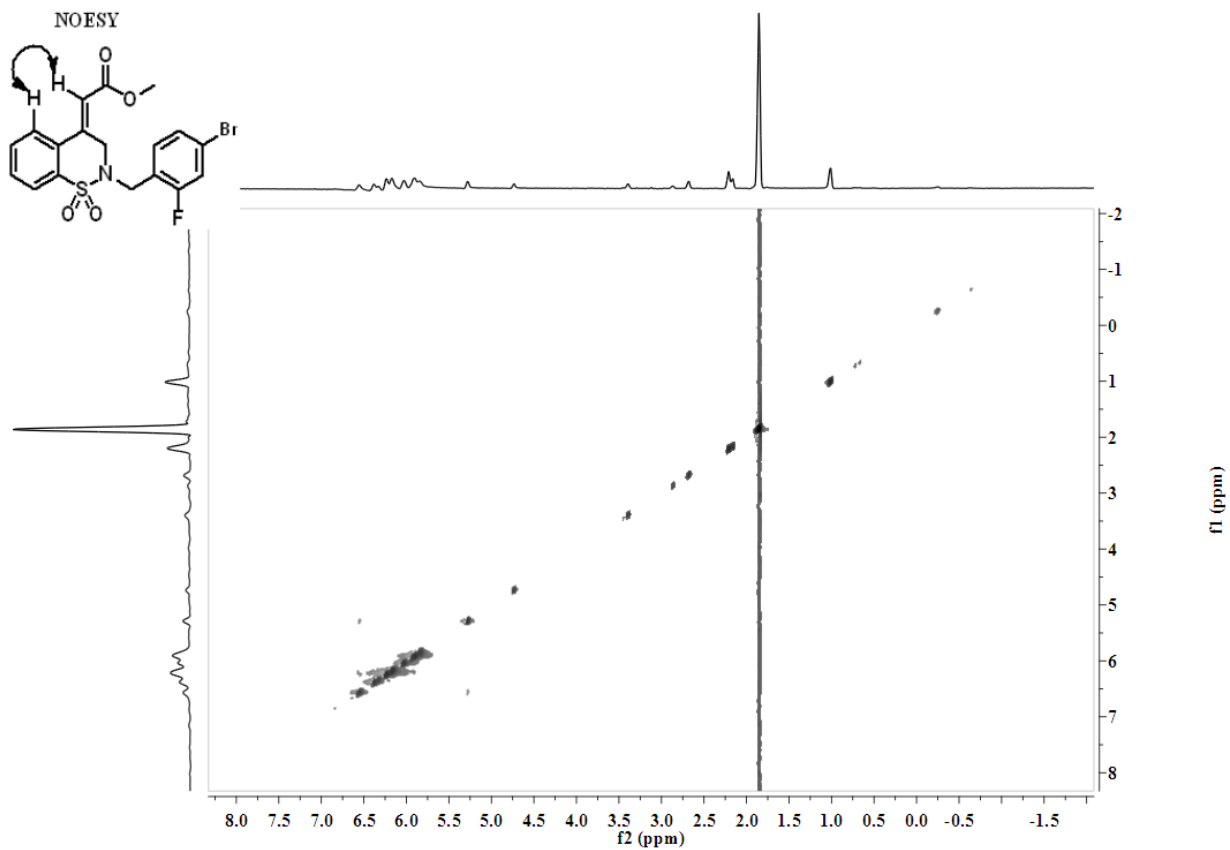

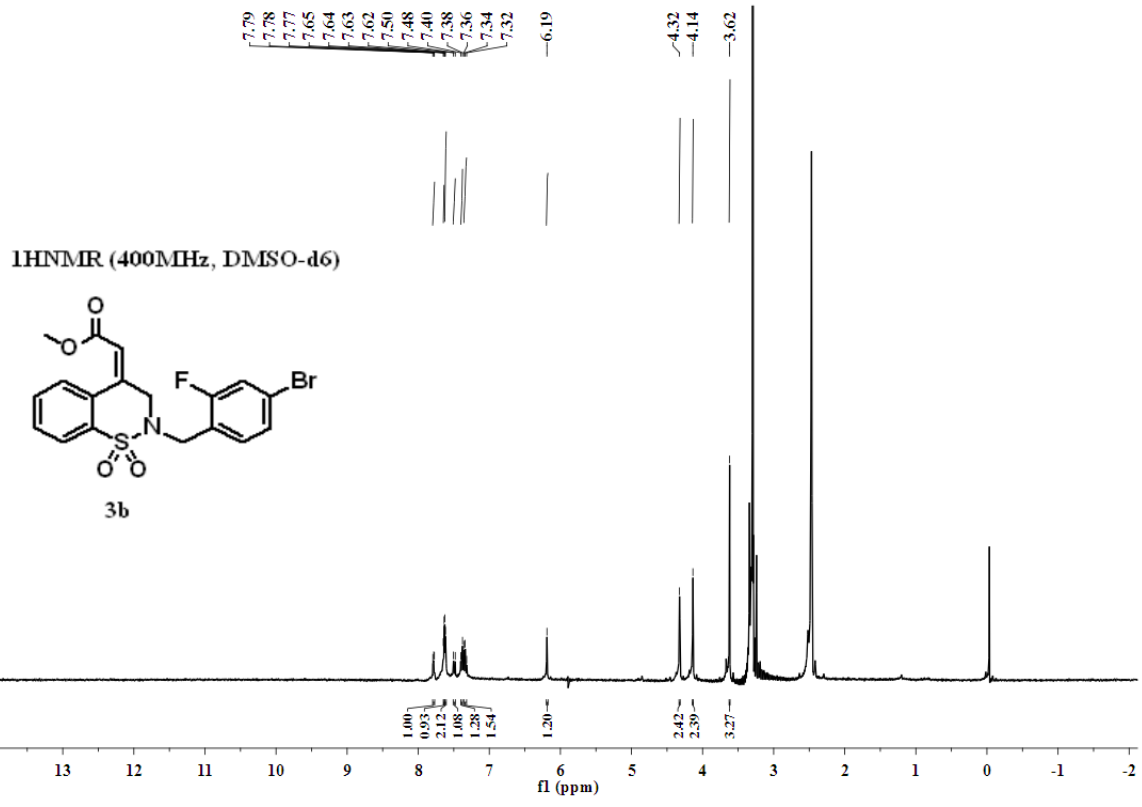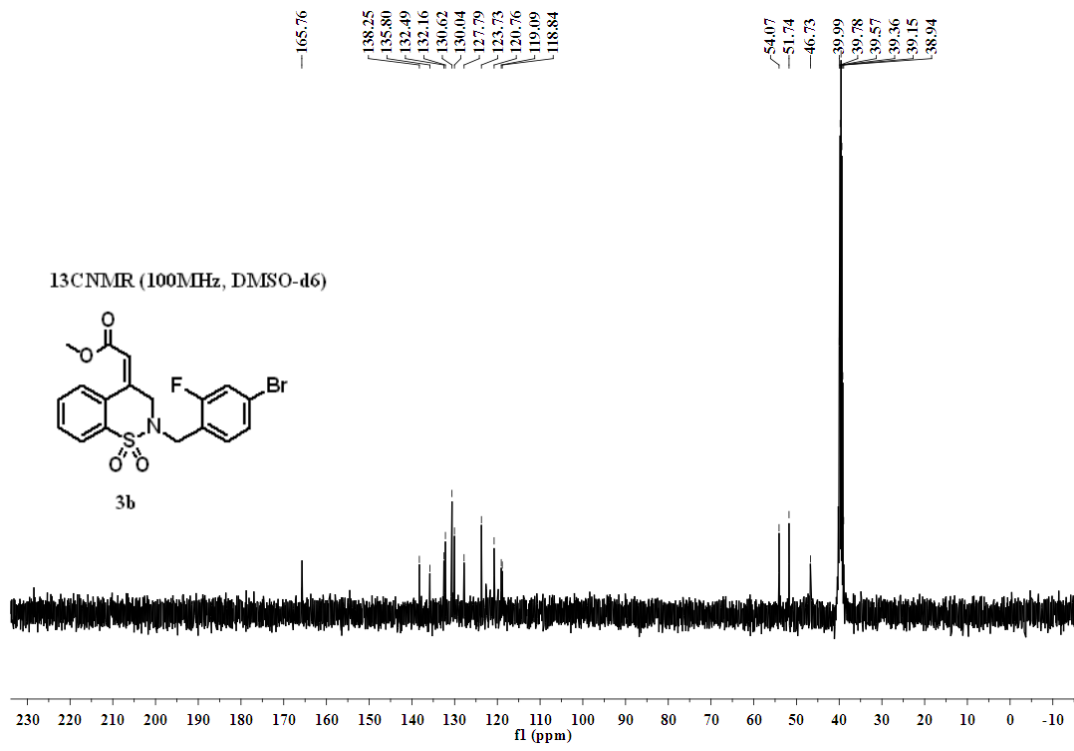

NOESY

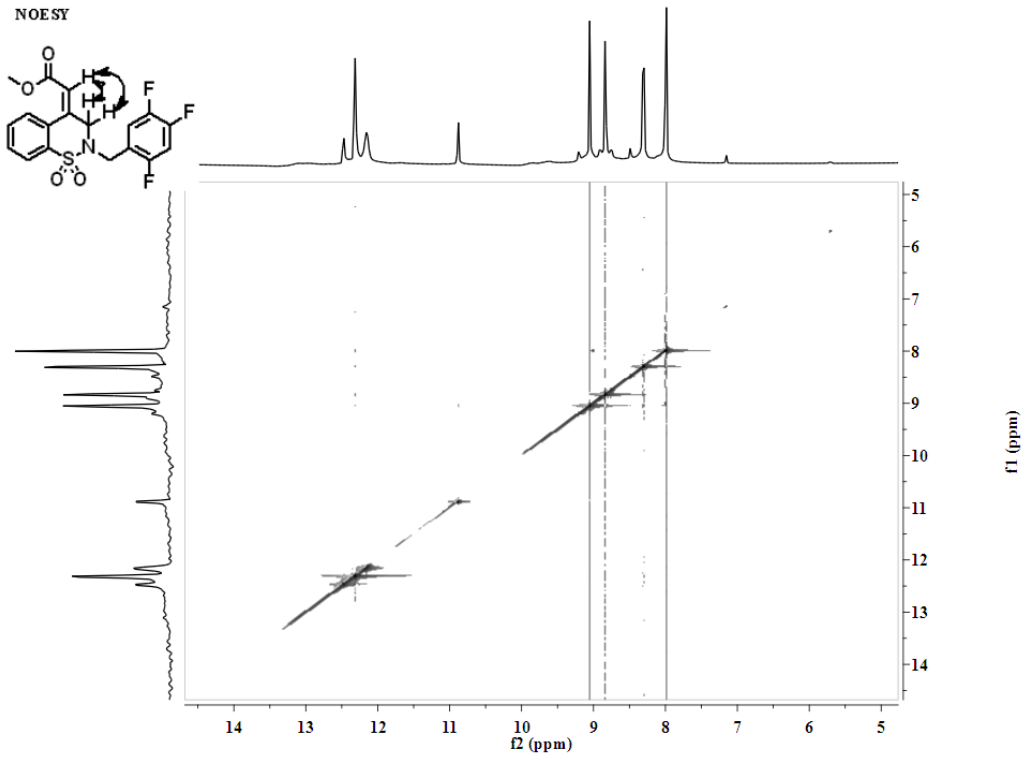

7.90  
7.88  
7.76  
7.74  
7.72  
7.62  
7.60  
7.59  
7.56  
7.54  
7.52  
7.43  
7.41  
7.29  
7.27  
7.25  
6.97  
4.94  
3.72  
3.60  
3.50

<sup>1</sup>H NMR (400MHz, DMSO-d<sub>6</sub>)

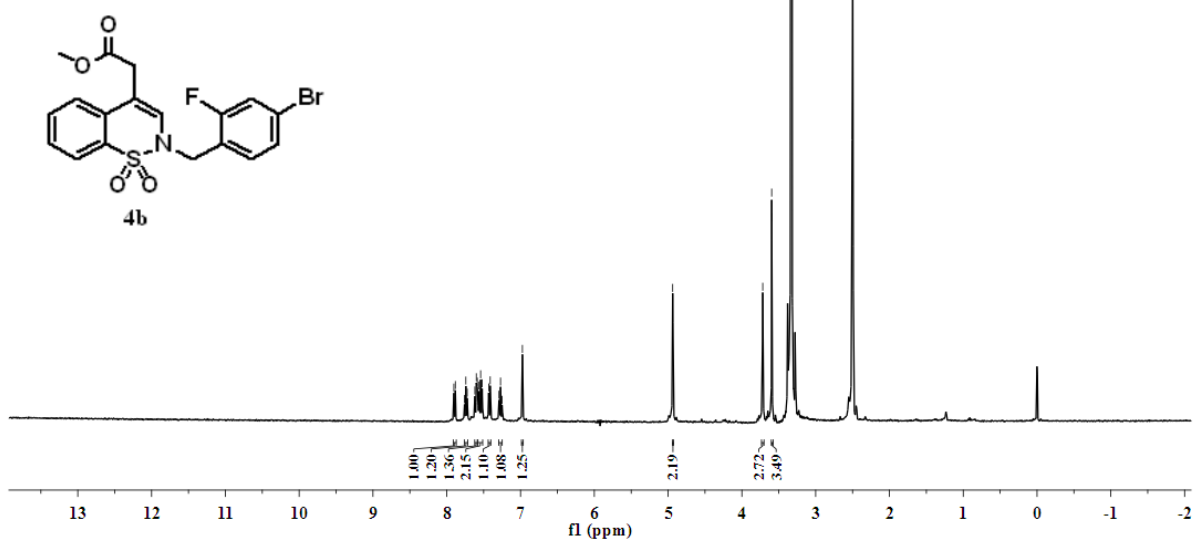

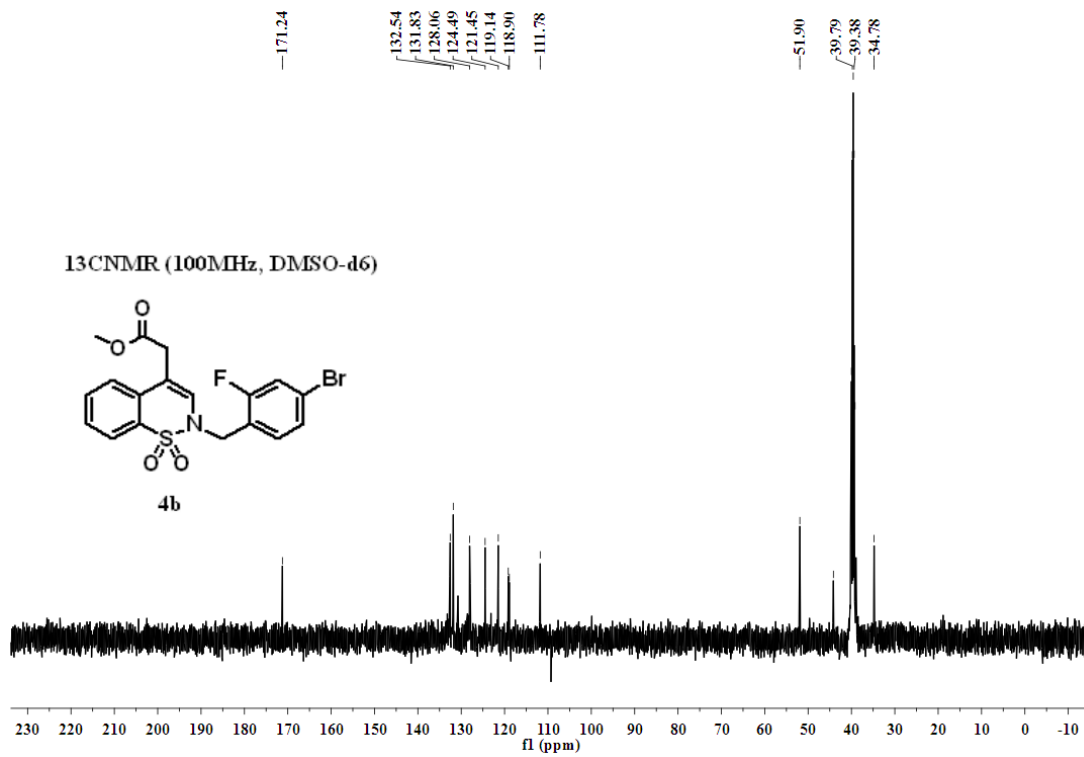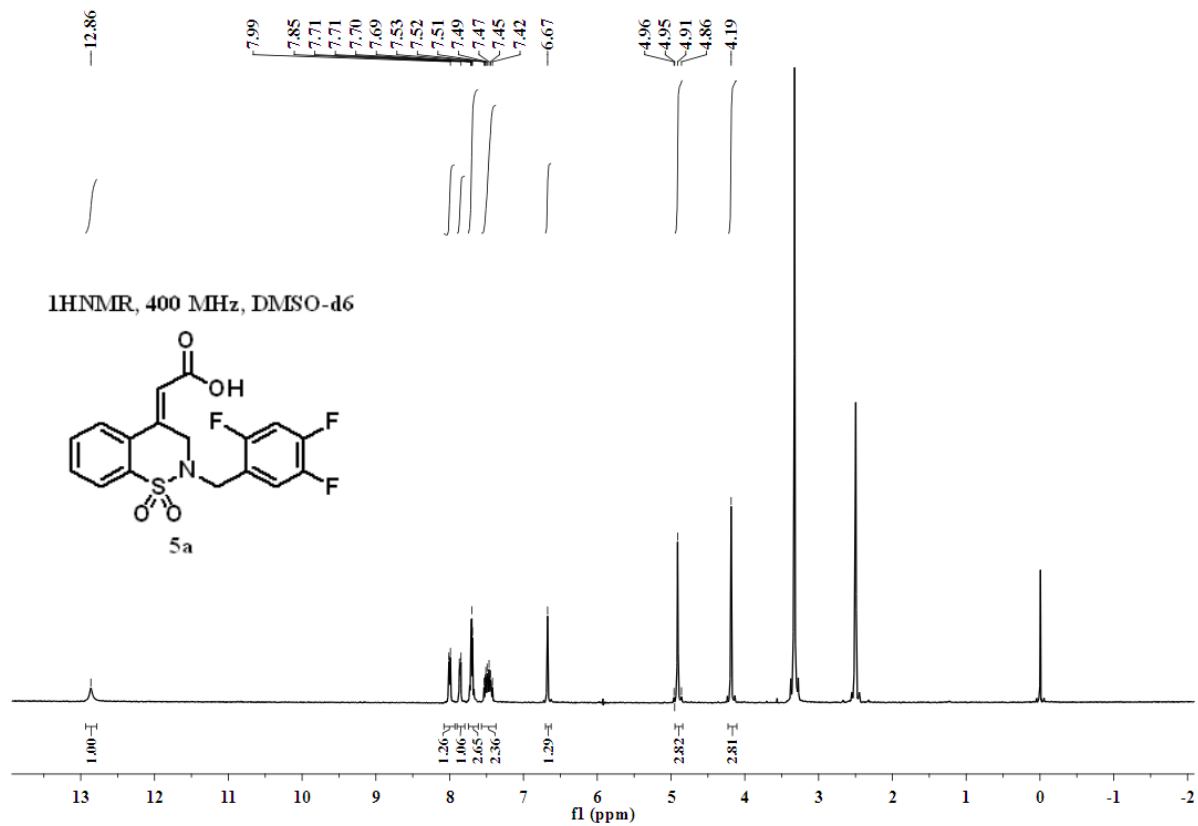

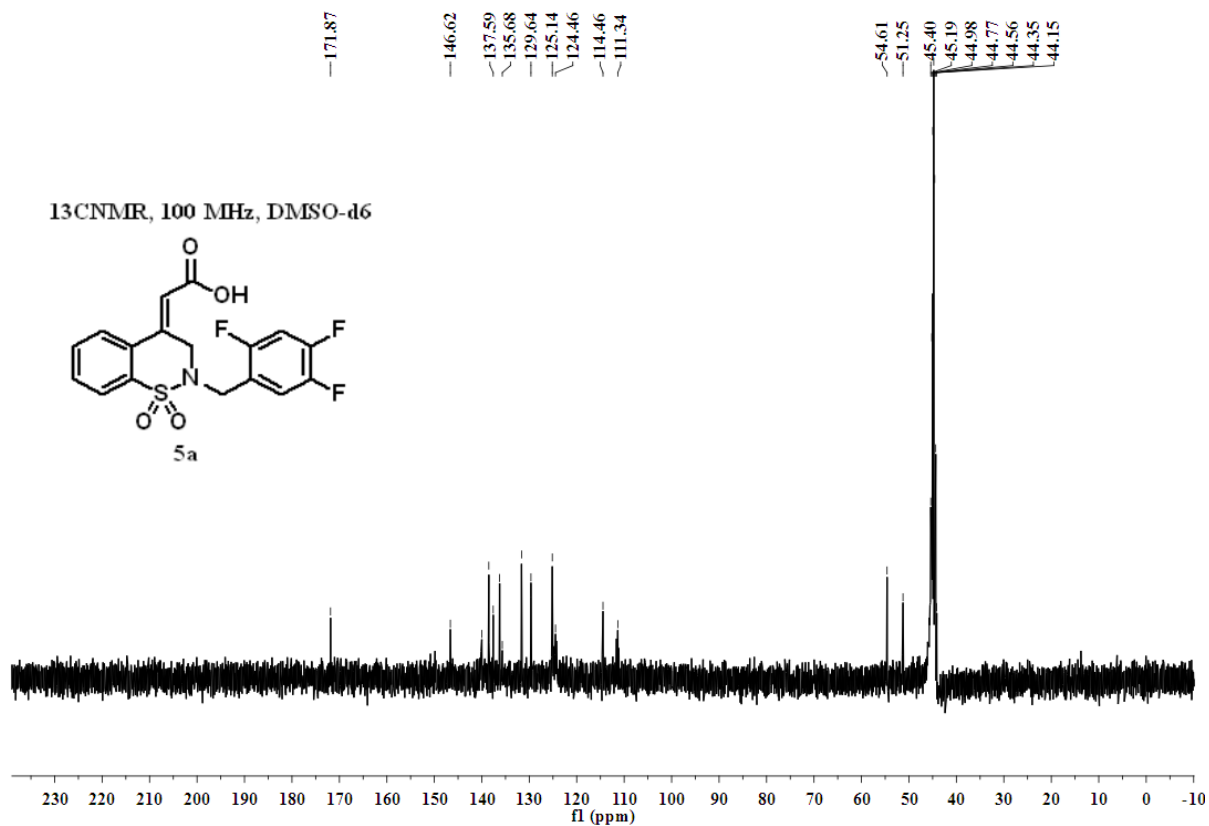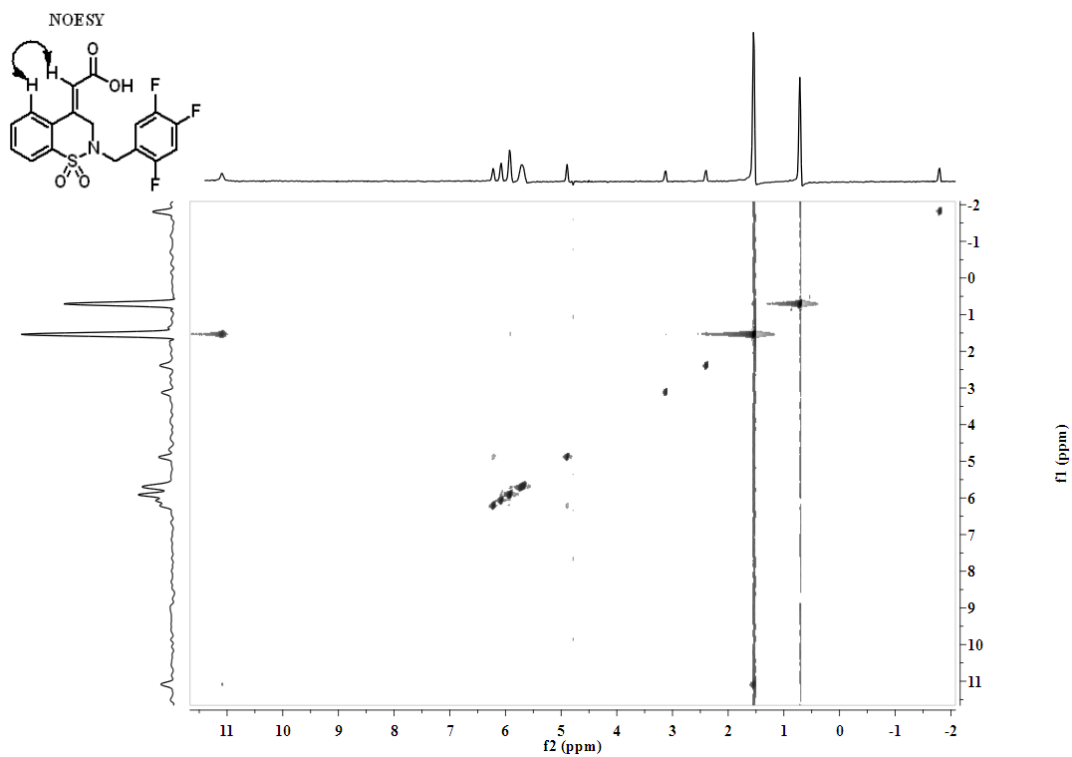

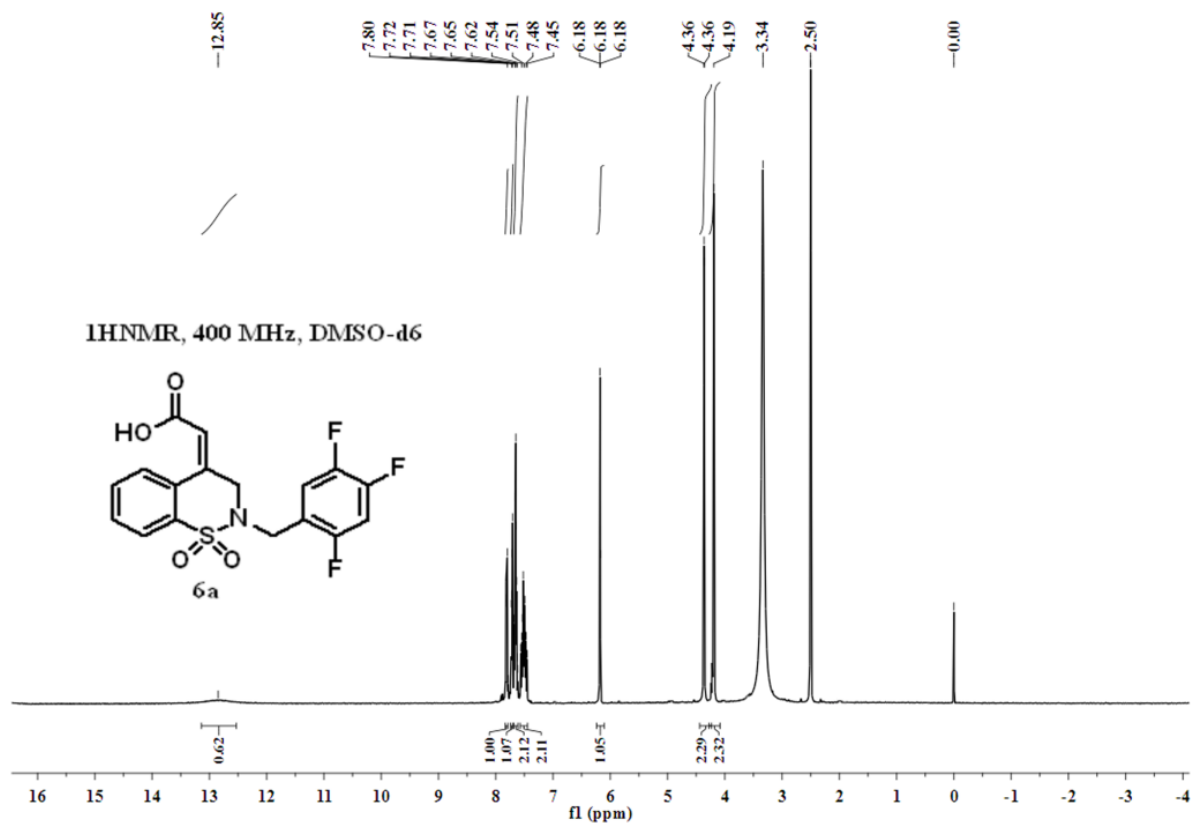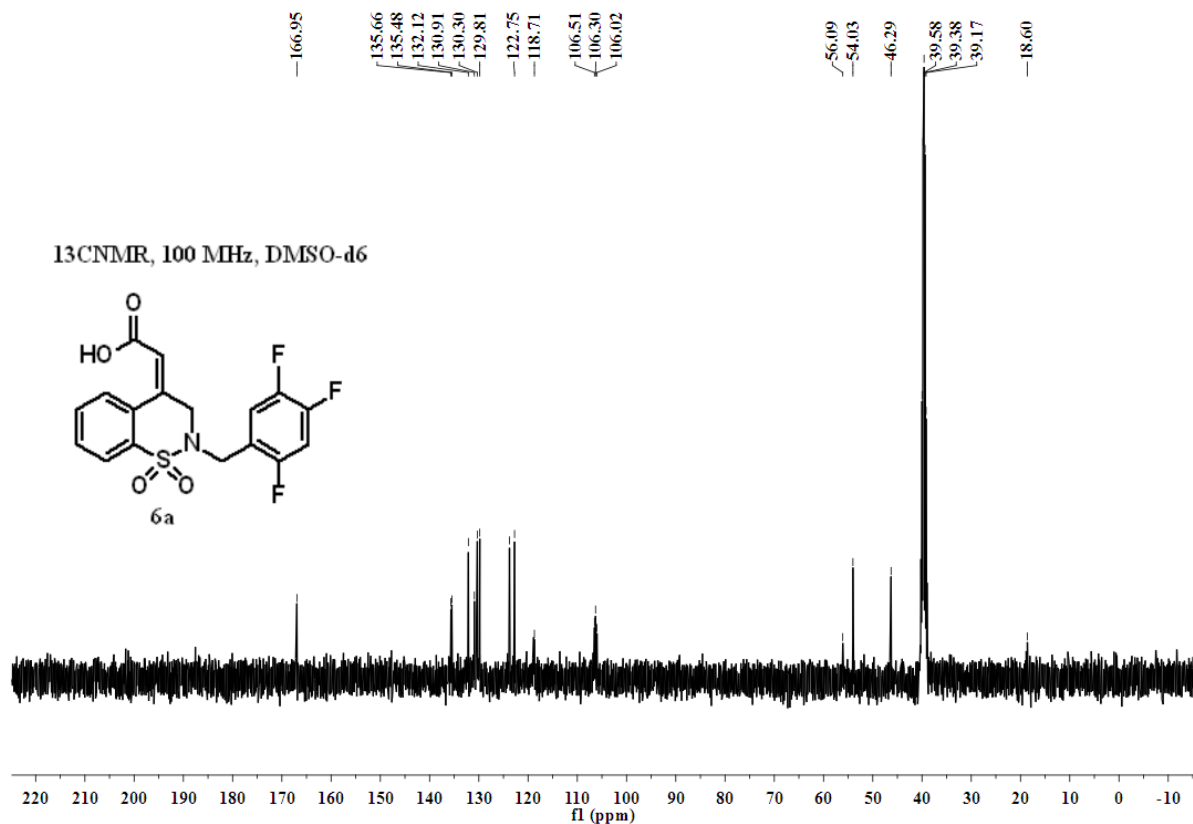

NOESY

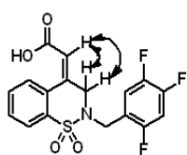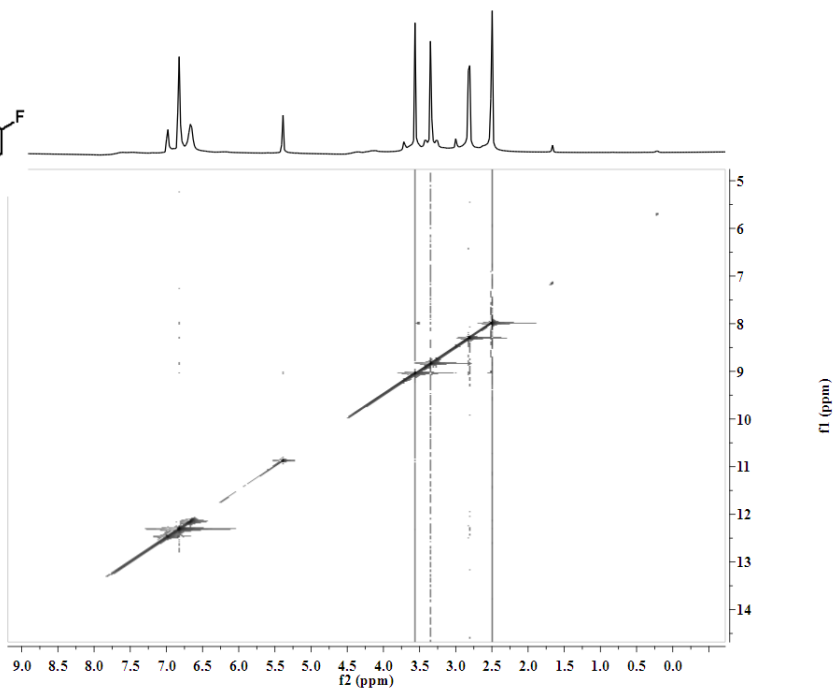

$^1\text{H}$ NMR, 400 MHz, DMSO- $d_6$

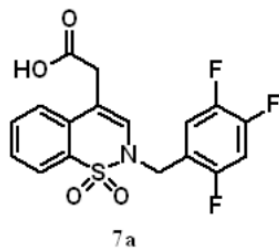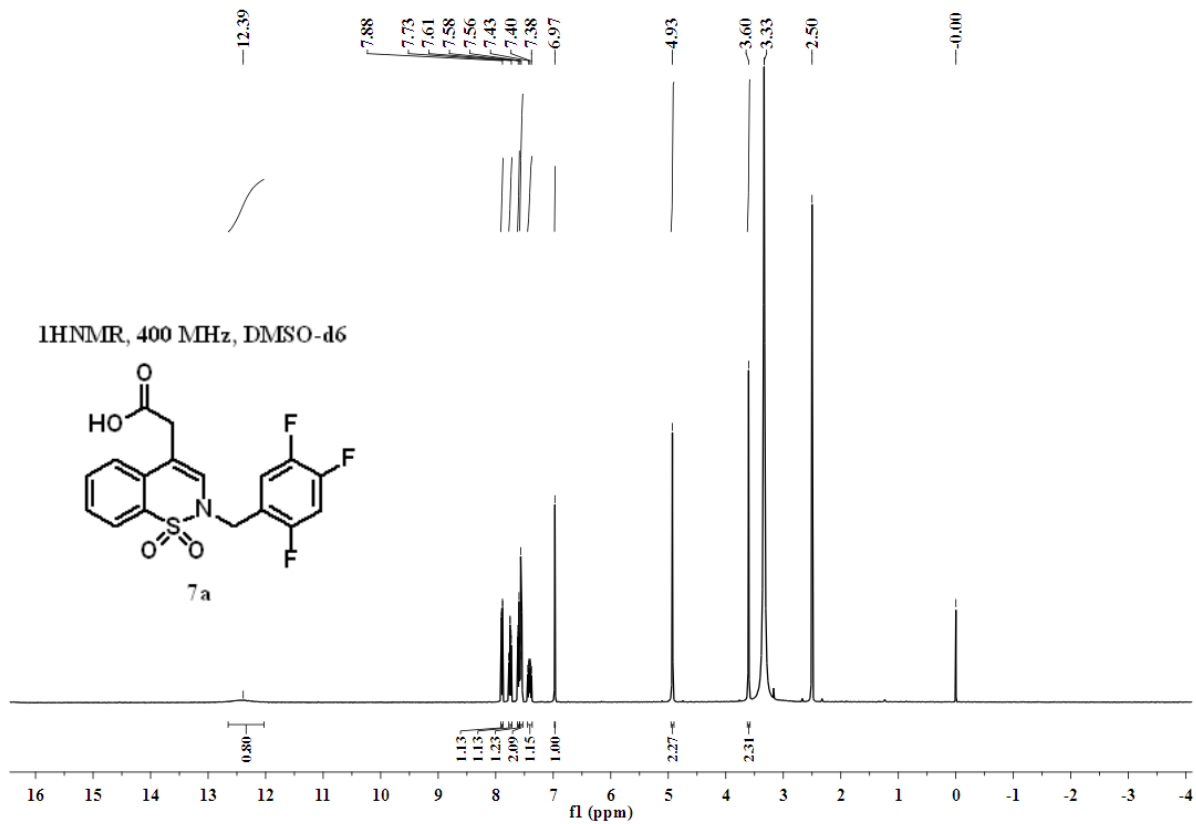

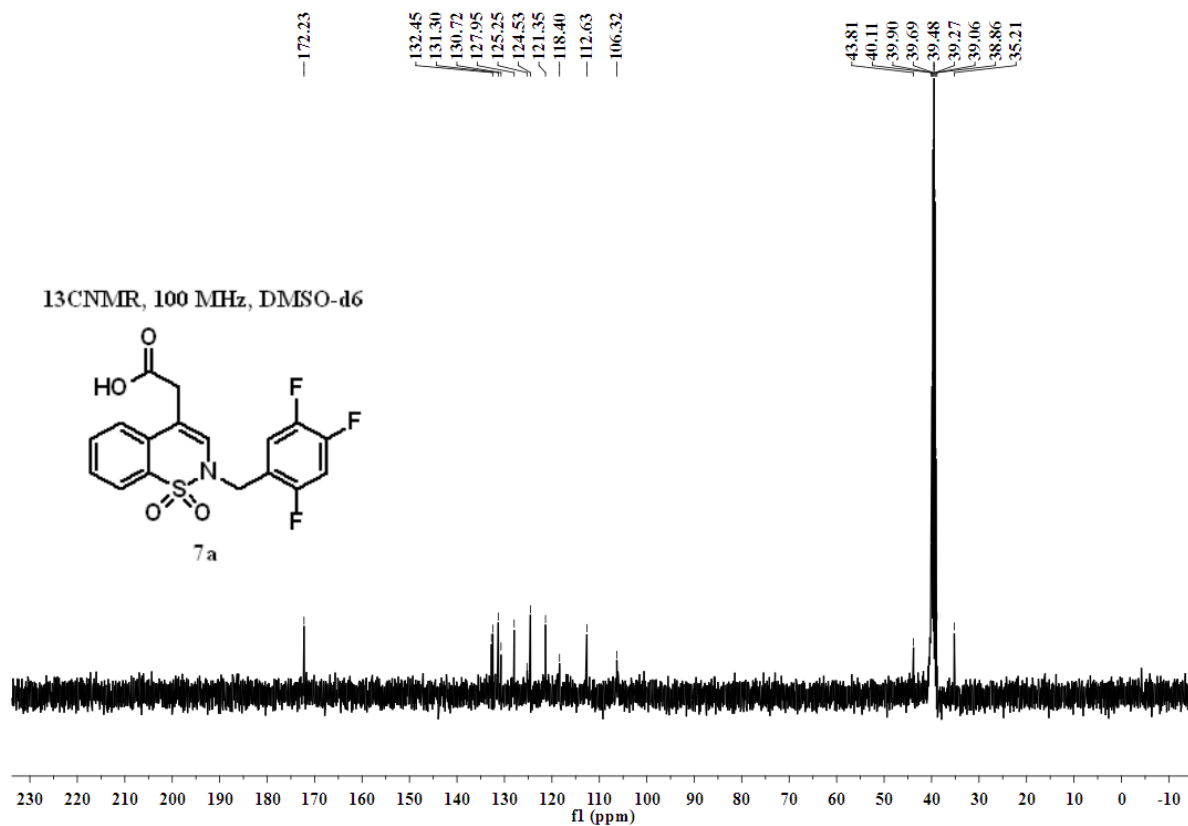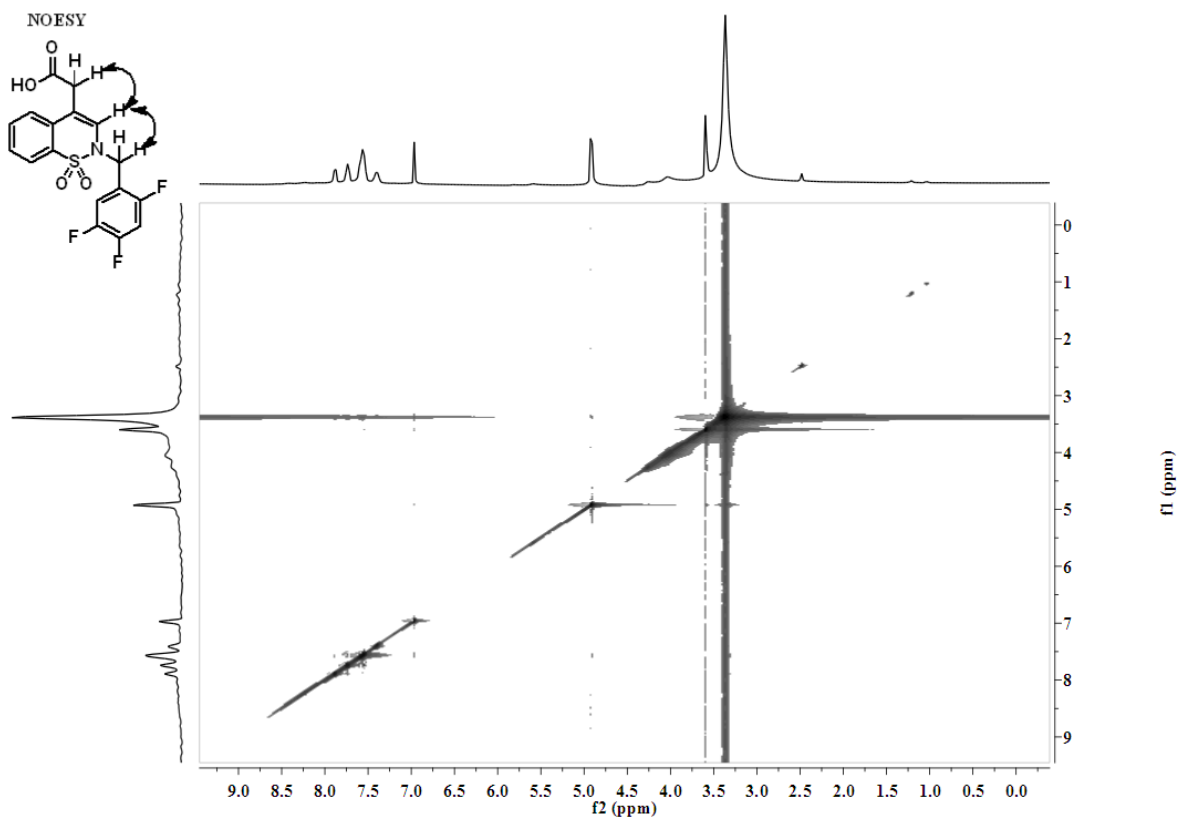



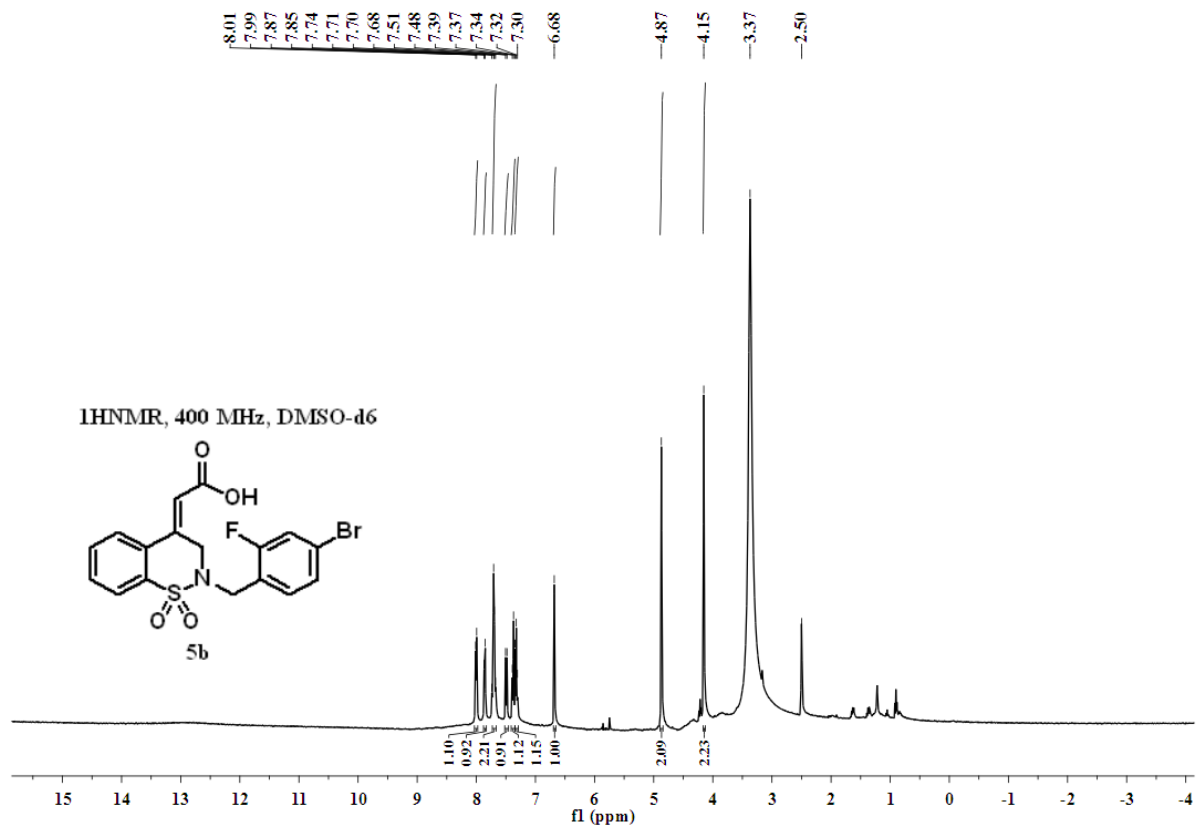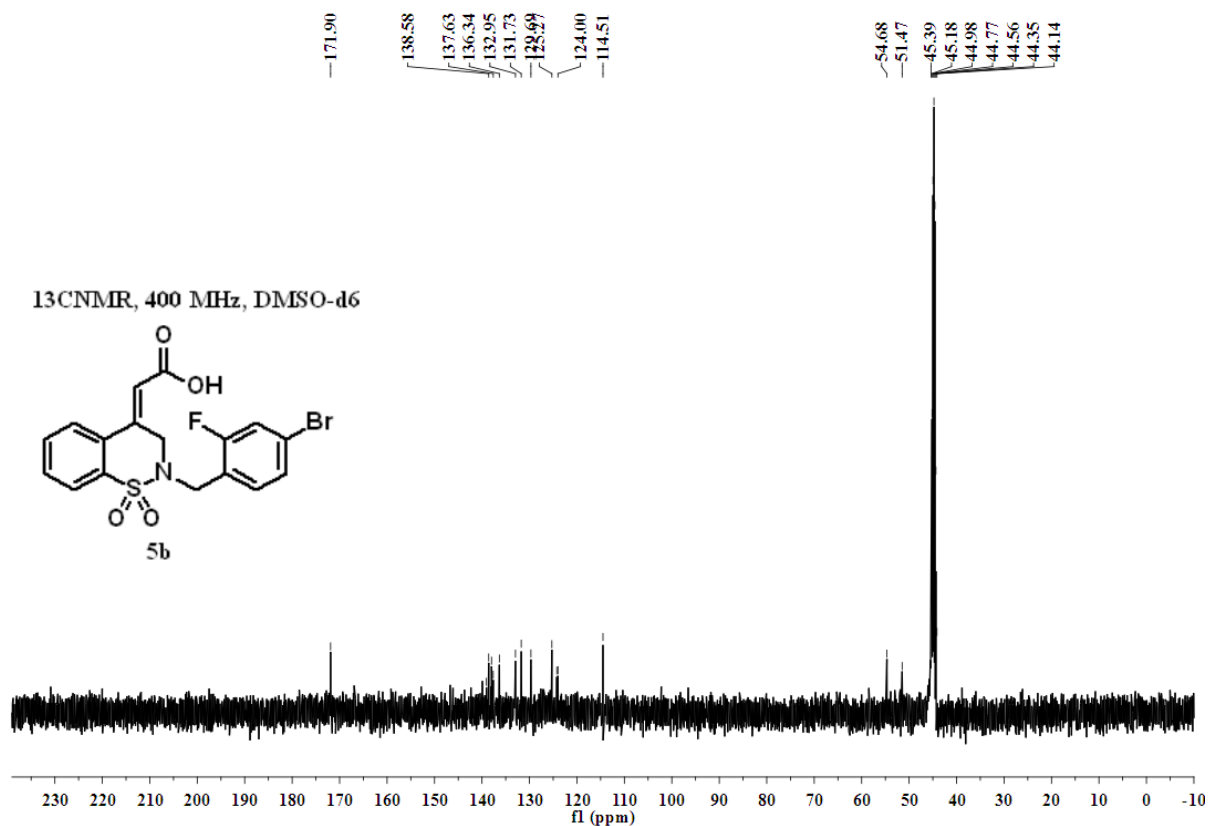

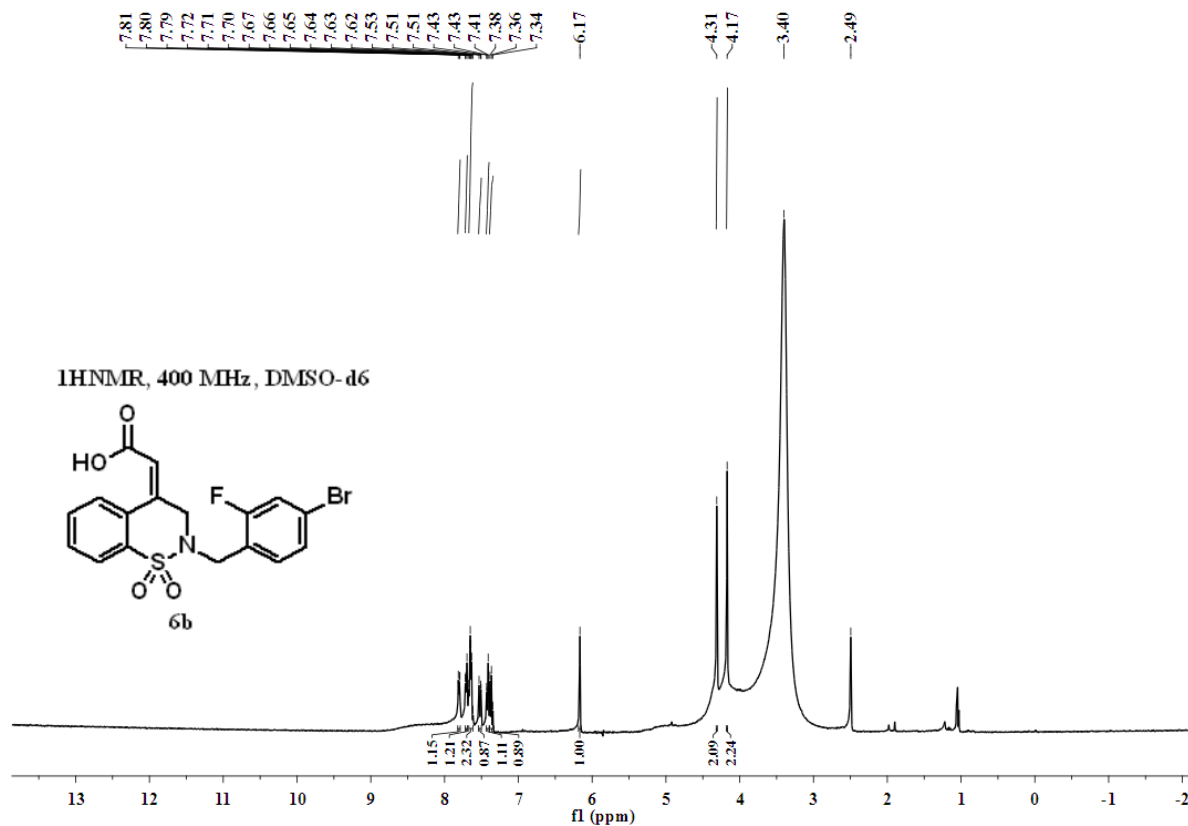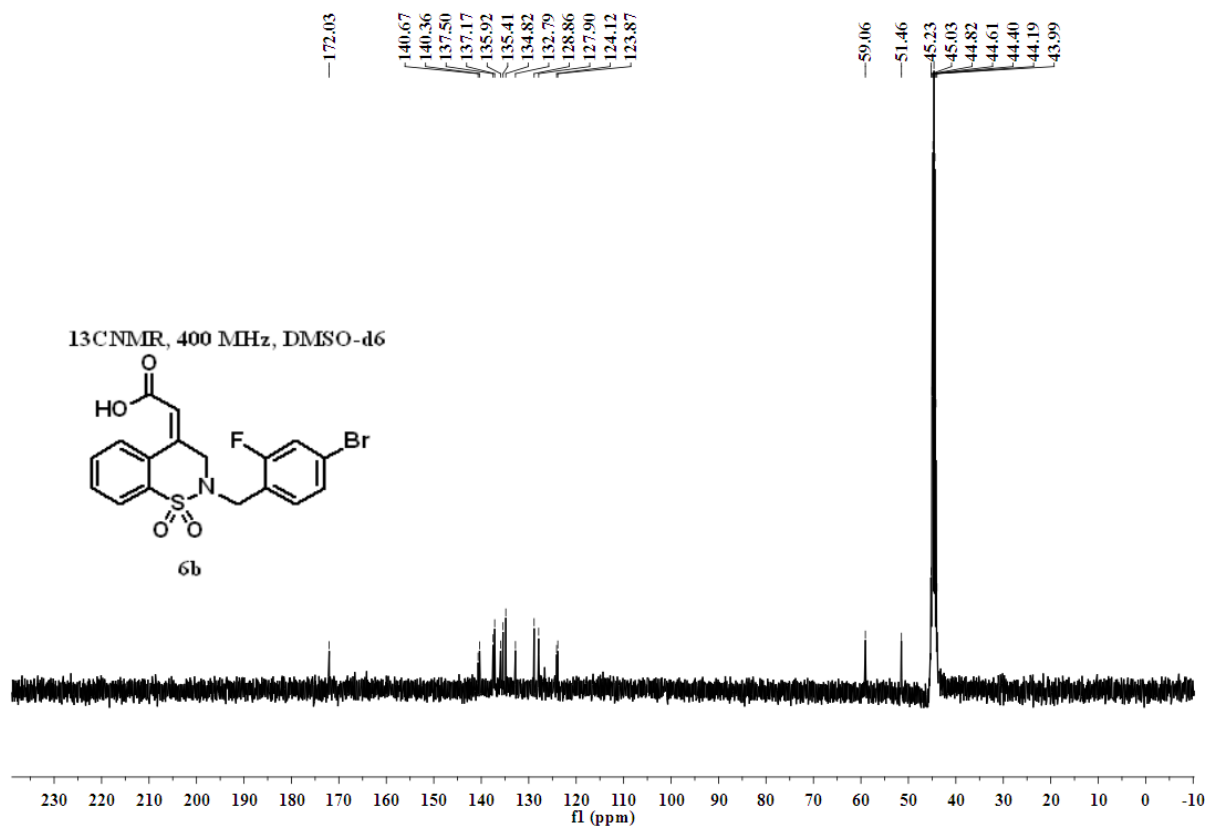

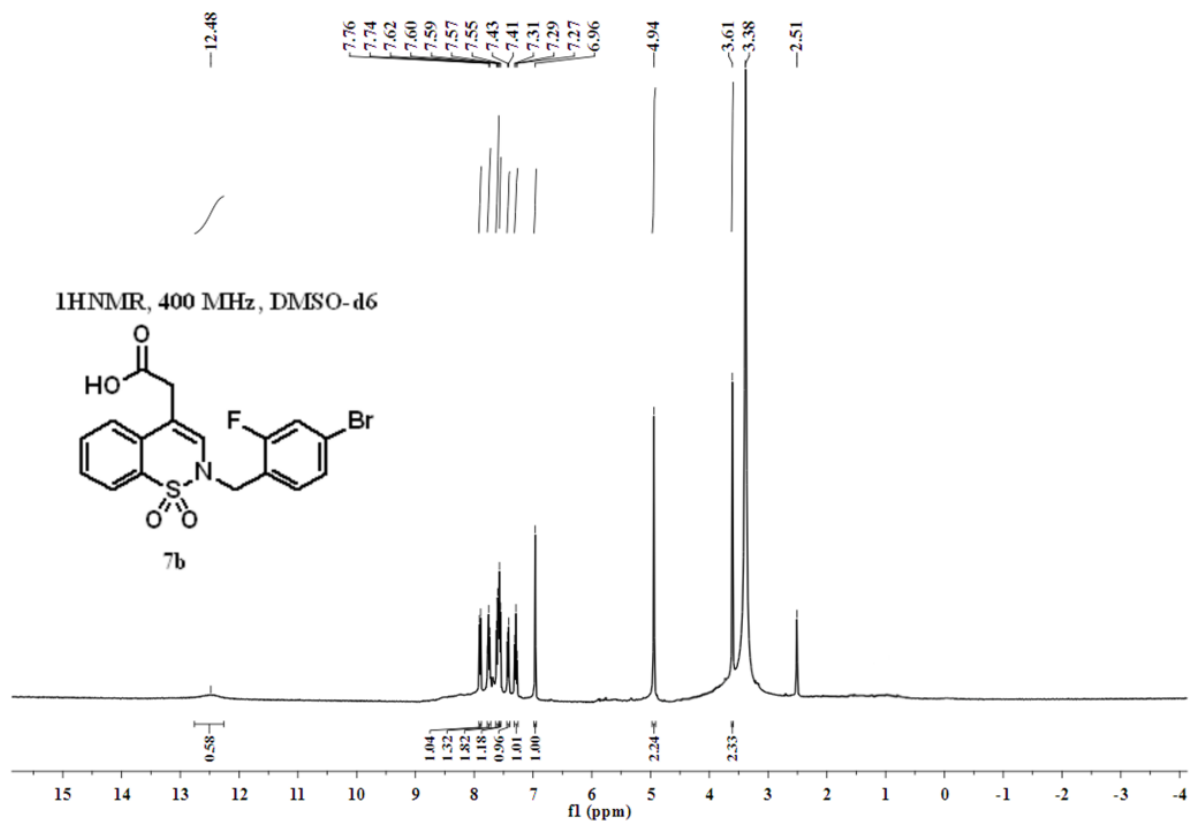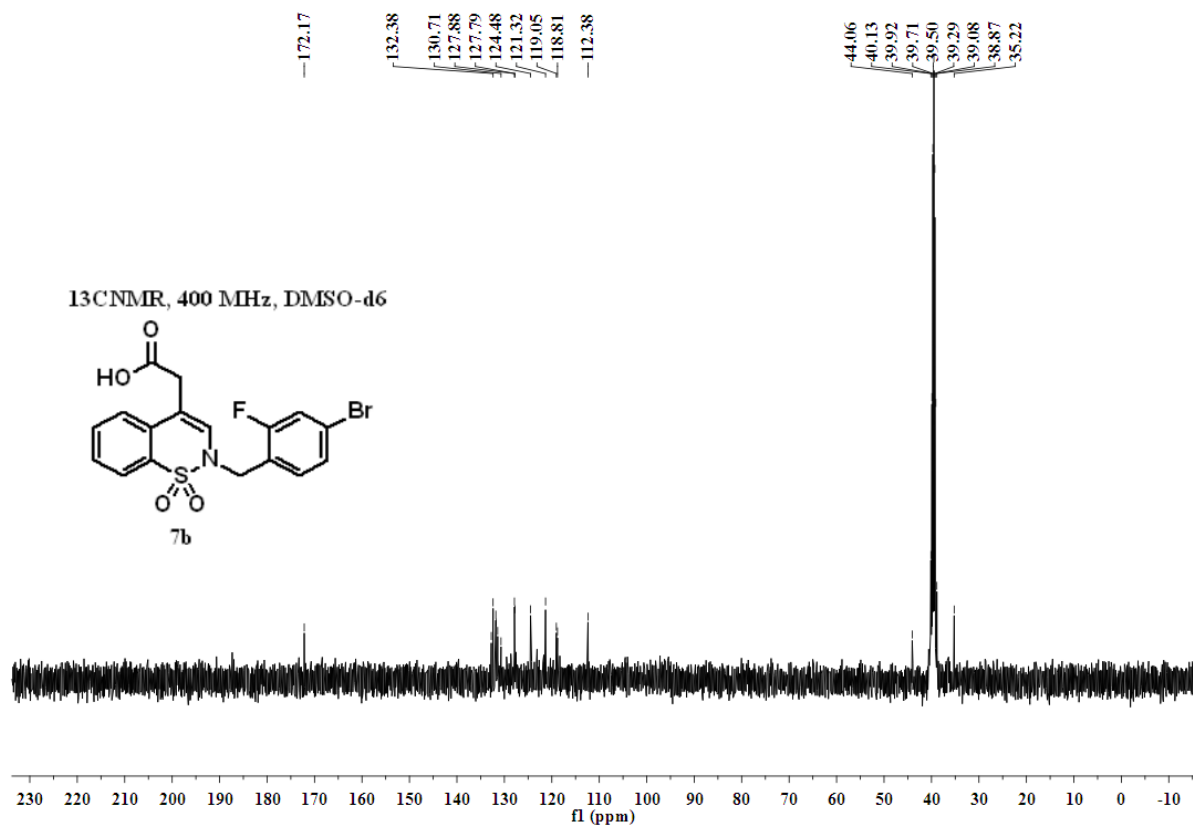

### 3: X-Ray Crystallography Data

#### 3.1: X-Ray Single Crystal analysis of 2a

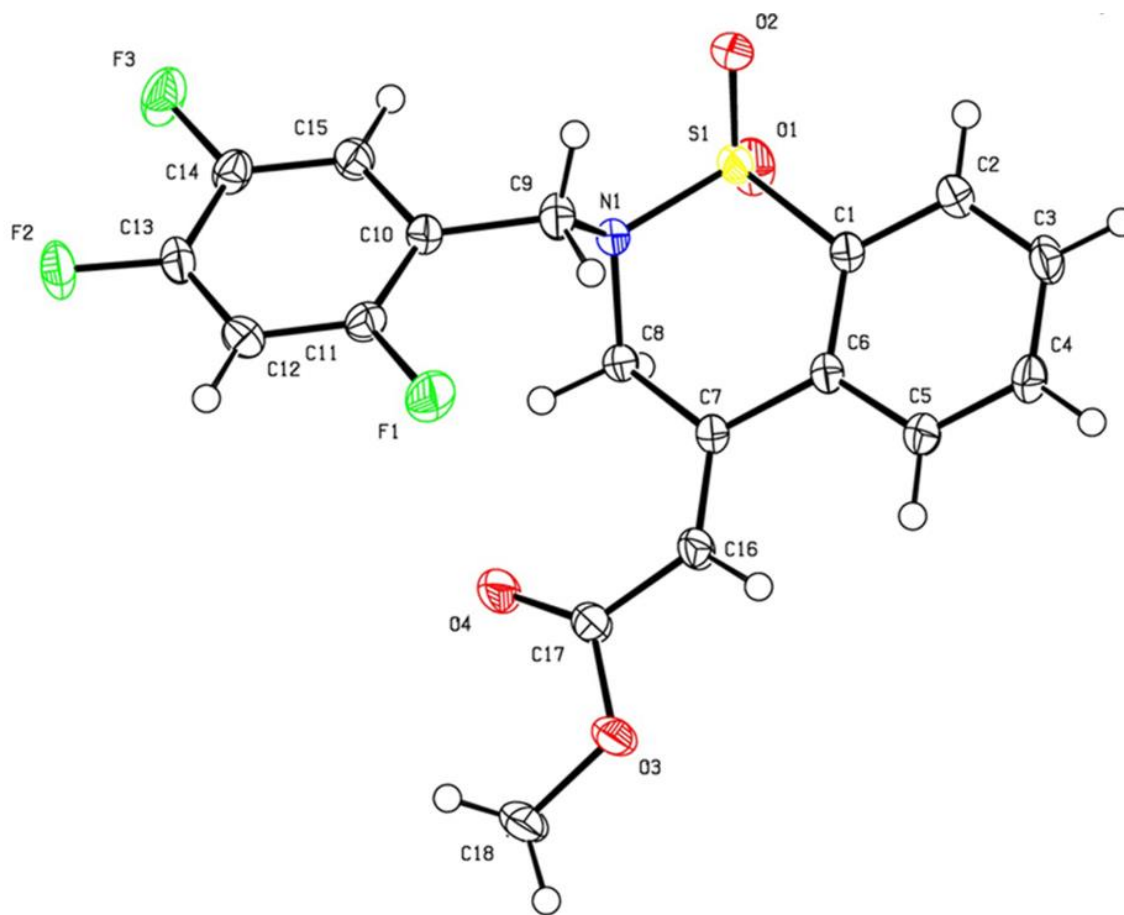

|                             |                                                                                    |
|-----------------------------|------------------------------------------------------------------------------------|
| Empirical formula           | $C_{18}H_{14}F_3NO_4S$                                                             |
| Formula weight              | 397.36                                                                             |
| Temperature                 | 153(2) K                                                                           |
| Wavelength                  | 0.71073 Å                                                                          |
| Crystal system, space group | Monoclinic, $C2/c$                                                                 |
| Unit cell dimensions        | $a = 18.947(5)$ Å $\alpha = 90$ deg.<br>$b = 8.529(2)$ Å $\beta = 110.800(3)$ deg. |

|                                   |                                                              |
|-----------------------------------|--------------------------------------------------------------|
|                                   | $c = 22.067(6) \text{ \AA}$ $\gamma = 90 \text{ deg.}$       |
| Volume                            | $3333.8(15) \text{ \AA}^3$                                   |
| Z, Calculated density             | 8, 1.583 Mg/m <sup>3</sup>                                   |
| Absorption coefficient            | $0.252 \text{ mm}^{-1}$                                      |
| F(000)                            | 1632                                                         |
| Crystal size                      | 0.60 x 0.40 x 0.34 mm                                        |
| Theta range for data collection   | 2.65 to 29.13 deg.                                           |
| Limiting indices                  | $-25 \leq h \leq 25, -11 \leq k \leq 11, -25 \leq l \leq 30$ |
| Reflections collected / unique    | 17852 / 4476 [R(int) = 0.0295]                               |
| Completeness to theta = 29.13     | 99.7 %                                                       |
| Absorption correction             | Semi-empirical from equivalents                              |
| Max. and min. transmission        | 0.9202 and 0.8633                                            |
| Refinement method                 | Full-matrix least-squares on F <sup>2</sup>                  |
| Data / restraints / parameters    | 4476 / 0 / 246                                               |
| Goodness-of-fit on F <sup>2</sup> | 1.000                                                        |
| Final R indices [I > 2σ(I)]       | R1 = 0.0425, wR2 = 0.1141                                    |
| R indices (all data)              | R1 = 0.0485, wR2 = 0.1201                                    |
| Extinction coefficient            | 0.0008(3)                                                    |
| Largest diff. peak and hole       | 0.272 and -0.387 e.Å <sup>-3</sup>                           |

### 3.2: X-Ray Single Crystal analysis of 4a

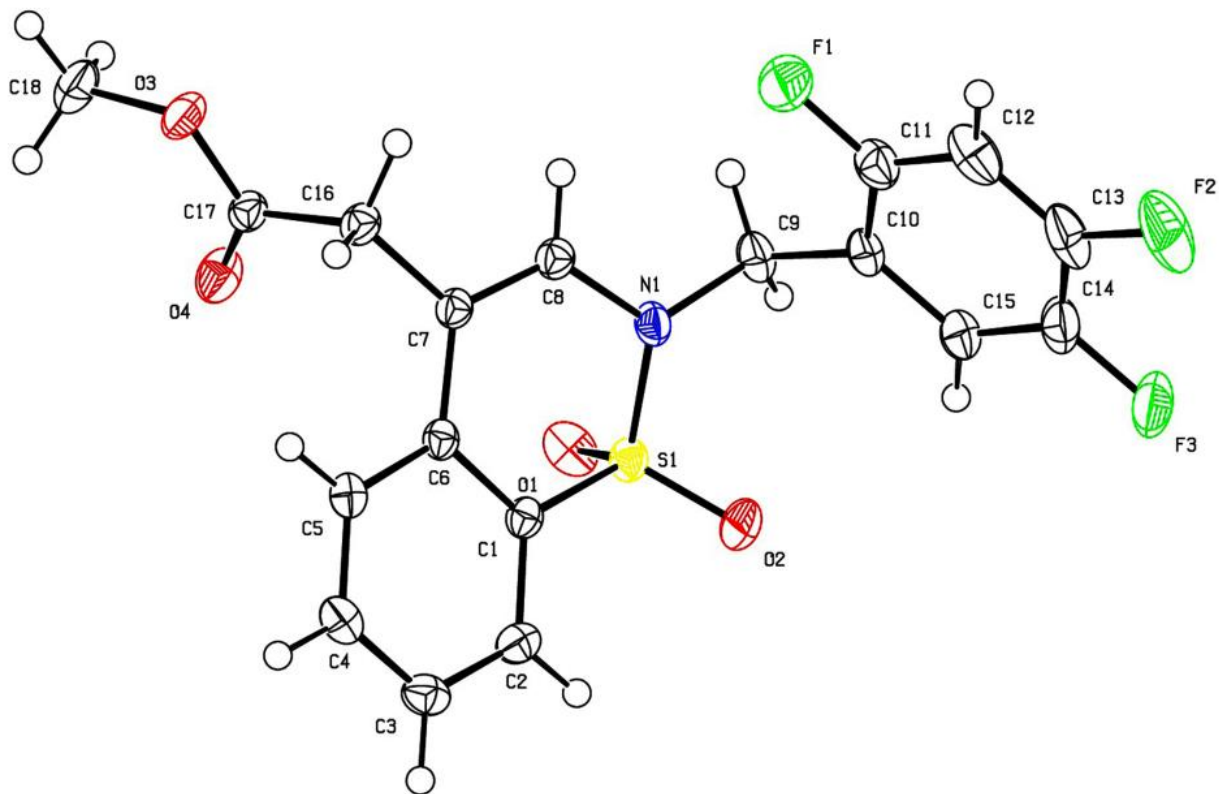

|                             |                                                                                                                                            |
|-----------------------------|--------------------------------------------------------------------------------------------------------------------------------------------|
| Empirical formula           | C <sub>18</sub> H <sub>14</sub> F <sub>3</sub> N O <sub>4</sub> S                                                                          |
| Formula weight              | 397.36                                                                                                                                     |
| Temperature                 | 153(2) K                                                                                                                                   |
| Wavelength                  | 0.71073 Å                                                                                                                                  |
| Crystal system, space group | Triclinic, P-1                                                                                                                             |
| Unit cell dimensions        | a = 9.1171(13) Å    alpha = 98.125(13) deg.<br>b = 9.6587(18) Å    beta = 103.944(10) deg.<br>c = 11.5594(18) Å    gamma = 117.147(8) deg. |
| Volume                      | 841.1(2) Å <sup>3</sup>                                                                                                                    |
| Z, Calculated density       | 2, 1.569 Mg/m <sup>3</sup>                                                                                                                 |
| Absorption coefficient      | 0.250 mm <sup>-1</sup>                                                                                                                     |
| F(000)                      | 408                                                                                                                                        |

|                                   |                                             |
|-----------------------------------|---------------------------------------------|
| Crystal size                      | 0.52 x 0.47 x 0.45 mm                       |
| Theta range for data collection   | 2.48 to 29.14 deg.                          |
| Limiting indices                  | -12<=h<=11, -13<=k<=13, -15<=l<=15          |
| Reflections collected / unique    | 10513 / 4426 [R(int) = 0.0279]              |
| Completeness to theta = 29.14     | 97.5 %                                      |
| Absorption correction             | Semi-empirical from equivalents             |
| Max. and min. transmission        | 0.8958 and 0.8809                           |
| Refinement method                 | Full-matrix least-squares on F <sup>2</sup> |
| Data / restraints / parameters    | 4426 / 0 / 246                              |
| Goodness-of-fit on F <sup>2</sup> | 1.004                                       |
| Final R indices [I>2sigma(I)]     | R1 = 0.0383, wR2 = 0.1007                   |
| R indices (all data)              | R1 = 0.0472, wR2 = 0.1063                   |
| Extinction coefficient            | 0.005(4)                                    |
| Largest diff. peak and hole       | 0.370 and -0.420 e.A <sup>-3</sup>          |
